# Supplementary material for: Carbazol-phenyl-phenothiazine-based sensitizers for dye-sensitized solar cells
Source: Royal Society of Chemistry journal article supplement (doi:10.1039/d1ta08020b), 2021-01-01
Supplement: d1ta08020b1.pdf [file d1ta08020b1.pdf]

## Supporting Information

### Carbazol-Phenyl-Phenothiazin-Based Sensitizers for Dye-Sensitized Solar Cells

Yunfei Jiao <sup>a, b</sup>, Shuaishuai Liu <sup>a</sup>, Zhongjin Shen <sup>b, \*</sup>, Le Mao <sup>a</sup>, Yongjie Ding <sup>a</sup>, Dan Ren <sup>b</sup>, Felix Thomas Eickemeyer <sup>b</sup>, Lukas Pfeifer <sup>b</sup>, Dapeng Cao <sup>a</sup>, Wenjuan Xu <sup>a</sup>, Juan Song <sup>a</sup>, Baoxiu Mi <sup>a, \*\*</sup>, Zhiqiang Gao <sup>a</sup>, Shaik M. Zakeeruddin <sup>b</sup>, Wei Huang <sup>a, c, \*\*\*</sup>, Michael Grätzel <sup>b, \*\*\*\*</sup>

<sup>a</sup> State Key Laboratory of Organic Electronics and Information Displays (SKLOEID), Institute of Advanced Materials (IAM), Nanjing University of Posts & Telecommunications (NJUPT), 9 Wenyuan Road, Nanjing 210023, China

<sup>b</sup> Laboratory of Photonics and Interfaces (LPI), Institute of Chemical Sciences and Engineering, École Polytechnique Fédérale de Lausanne (EPFL), Lausanne 1015, Switzerland

<sup>c</sup> Frontiers Science Center for Flexible Electronics (FSCFE), MIIT Key Laboratory of Flexible Electronics (KLoFE), Northwestern Polytechnical University (NPU), 127 West Youyi Road, Xi'an 710072, China

\* E-mail: [zhongjin.shen@epfl.ch](mailto:zhongjin.shen@epfl.ch)

\*\* E-mail: [iambxmi@njupt.edu.cn](mailto:iambxmi@njupt.edu.cn)

\*\*\* E-mail: [wei-huang@njtech.edu.cn](mailto:wei-huang@njtech.edu.cn)

\*\*\*\* E-mail: [michael.gratzel@epfl.ch](mailto:michael.gratzel@epfl.ch)

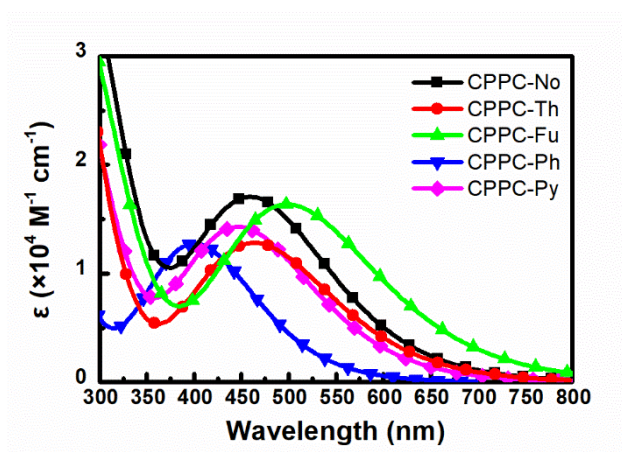

**Fig. S1.** Calculated absorption spectra of **CPPC** dyes.

**Table S1** Dipole moments of **CPPC** dyes.

| Dye            | $\mu_{\text{Tot}}$ | $\mu_x$ | $\mu_y$ | $\mu_z$ |
|----------------|--------------------|---------|---------|---------|
| <b>CPPC-No</b> | 8.8147             | 2.7759  | 8.3646  | -0.1631 |
| <b>CPPC-Th</b> | 9.1231             | -6.6880 | 6.1779  | -0.5764 |
| <b>CPPC-Fu</b> | 15.3569            | -3.4627 | 14.9611 | 0.0362  |
| <b>CPPC-Ph</b> | 9.1135             | 4.9464  | 7.6399  | 0.4649  |
| <b>CPPC-Py</b> | 9.8406             | -3.9134 | 9.0271  | -0.1778 |

**Table S2** Photovoltaic parameters of the devices based on **CPPC-Fu** dyes with different concentrations of LiI.

| Batch | LiI (M) | $P_{\text{in}}$ (mW cm <sup>-2</sup> ) | $J_{\text{SC}}$ (mA cm <sup>-2</sup> ) | $V_{\text{OC}}$ (mV) | $FF$  | $PCE$ (%) | Normalization |
|-------|---------|----------------------------------------|----------------------------------------|----------------------|-------|-----------|---------------|
| 1     | 0       | 99.9                                   | 10.11                                  | 783.2                | 0.803 | 6.34      | 0.92          |
|       |         | 99.8                                   | 9.88                                   | 788.3                | 0.810 | 6.31      | 0.92          |
|       | 0.05    | 100.1                                  | 10.10                                  | 777.4                | 0.811 | 6.36      | 0.93          |
|       |         | 99.9                                   | 10.97                                  | 773.9                | 0.776 | 6.59      | 0.96          |
|       | 0.1     | 99.9                                   | 11.04                                  | 763.4                | 0.773 | 6.52      | 0.95          |
|       |         | 99.9                                   | 10.85                                  | 762.3                | 0.785 | 6.5       | 0.95          |
|       | 0.15    | 99.8                                   | 11.40                                  | 735.7                | 0.777 | 6.53      | 0.95          |
|       |         | 99.8                                   | 10.86                                  | 738.4                | 0.802 | 6.45      | 0.94          |
|       | 0.2     | 99.8                                   | 11.44                                  | 750.8                | 0.79  | 6.8       | 0.99          |
|       |         | 99.7                                   | 11.73                                  | 752.3                | 0.775 | 6.86      | 1.00          |
| 2     | 0.2     | 98.8                                   | 12.36                                  | 736.7                | 0.646 | 5.96      | 0.98          |
|       |         | 98.8                                   | 12.50                                  | 733.1                | 0.650 | 6.07      | 1.00          |
|       | 0.4     | 98.8                                   | 13.38                                  | 708.4                | 0.628 | 6.02      | 0.99          |
|       |         | 98.7                                   | 13.15                                  | 715.3                | 0.625 | 5.96      | 0.98          |
|       | 0.6     | 98.8                                   | 12.90                                  | 697.6                | 0.617 | 5.61      | 0.92          |
|       |         | 98.7                                   | 13.70                                  | 690.6                | 0.572 | 5.48      | 0.90          |

|     |      |       |       |       |      |      |
|-----|------|-------|-------|-------|------|------|
| 0.8 | 98.7 | 13.63 | 687.6 | 0.557 | 5.29 | 0.87 |
|     | 98.8 | 13.58 | 690.3 | 0.627 | 5.95 | 0.98 |
| 1.0 | 98.7 | 14.17 | 667.2 | 0.586 | 5.61 | 0.92 |
|     | 98.6 | 14.23 | 671.0 | 0.527 | 5.10 | 0.84 |

Z960 (1 M DMII, 0.05 M LiI, 0.03 M I<sub>2</sub>, 0.5 M tBP and 0.1 M GNCS in ACN) was used as reference electrolyte during device optimization. The concentrations of the components in Z960 with the exception of LiI were proven to be the optimal in this work. Two batches of devices with different concentrations of LiI were made independently. 0.2 M LiI was selected based on the normalized *PCE*, four times as much as in Z960 (0.05 M LiI). Compared with the devices using Z960, the *V*<sub>OC</sub> and *FF* were decreased a little bit, on the contrary, for *J*<sub>SC</sub> a big increase was observed.

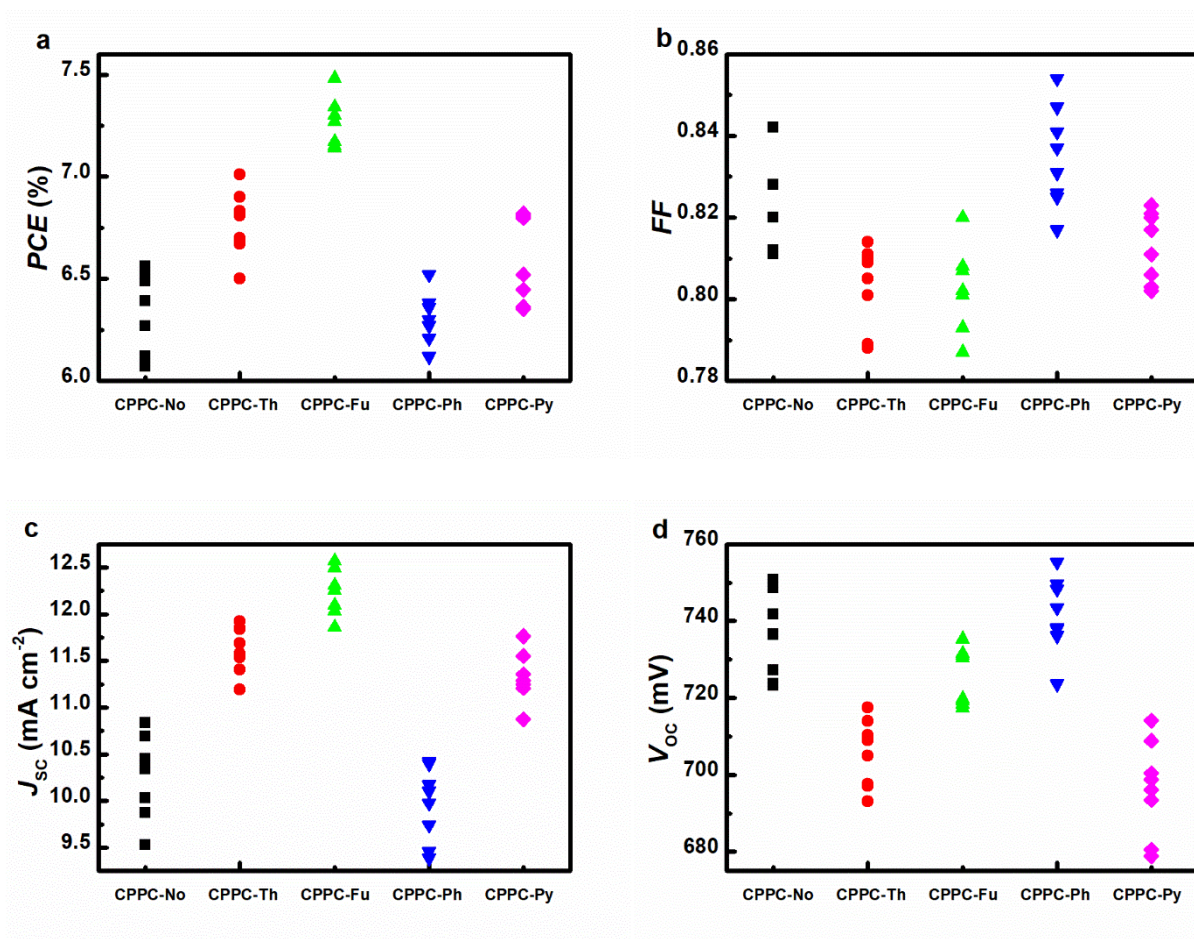

**Fig. S2.** Statistical data (a) *PCE*, (b) *FF*, (c) *J*<sub>SC</sub> and (d) *V*<sub>OC</sub> based on 8 cells for each dye.

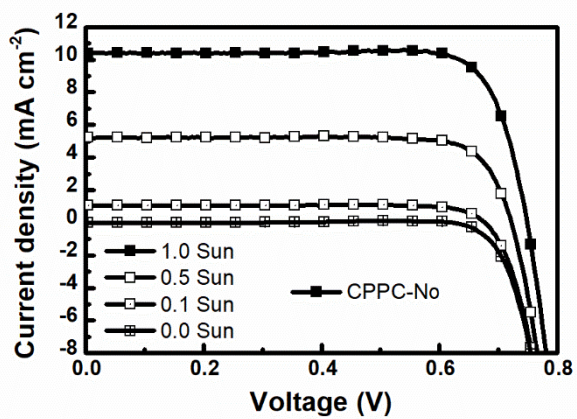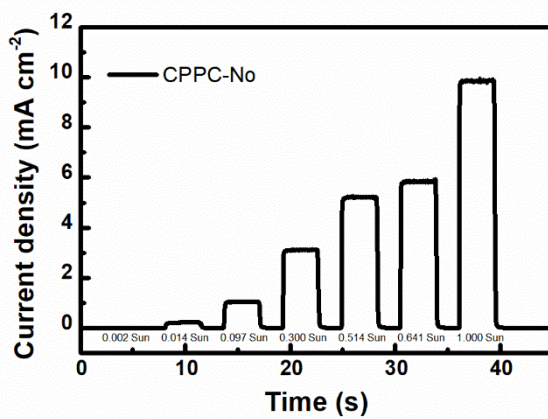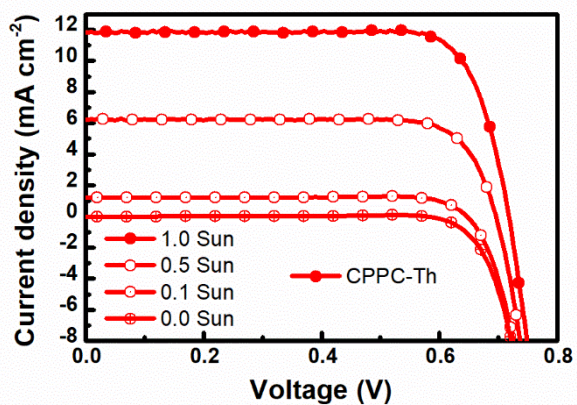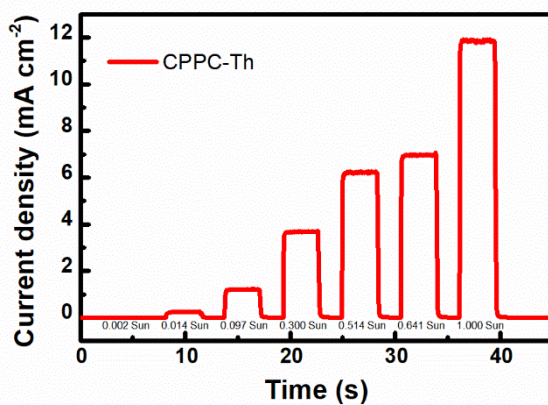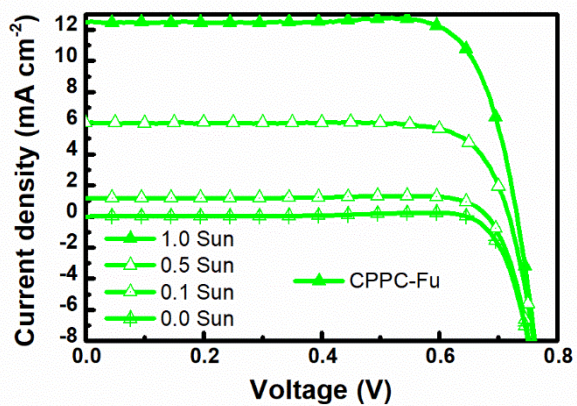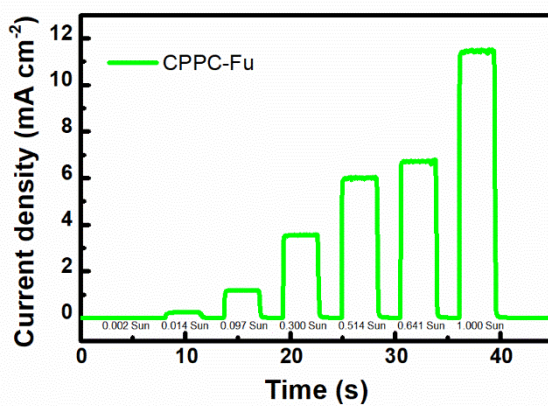



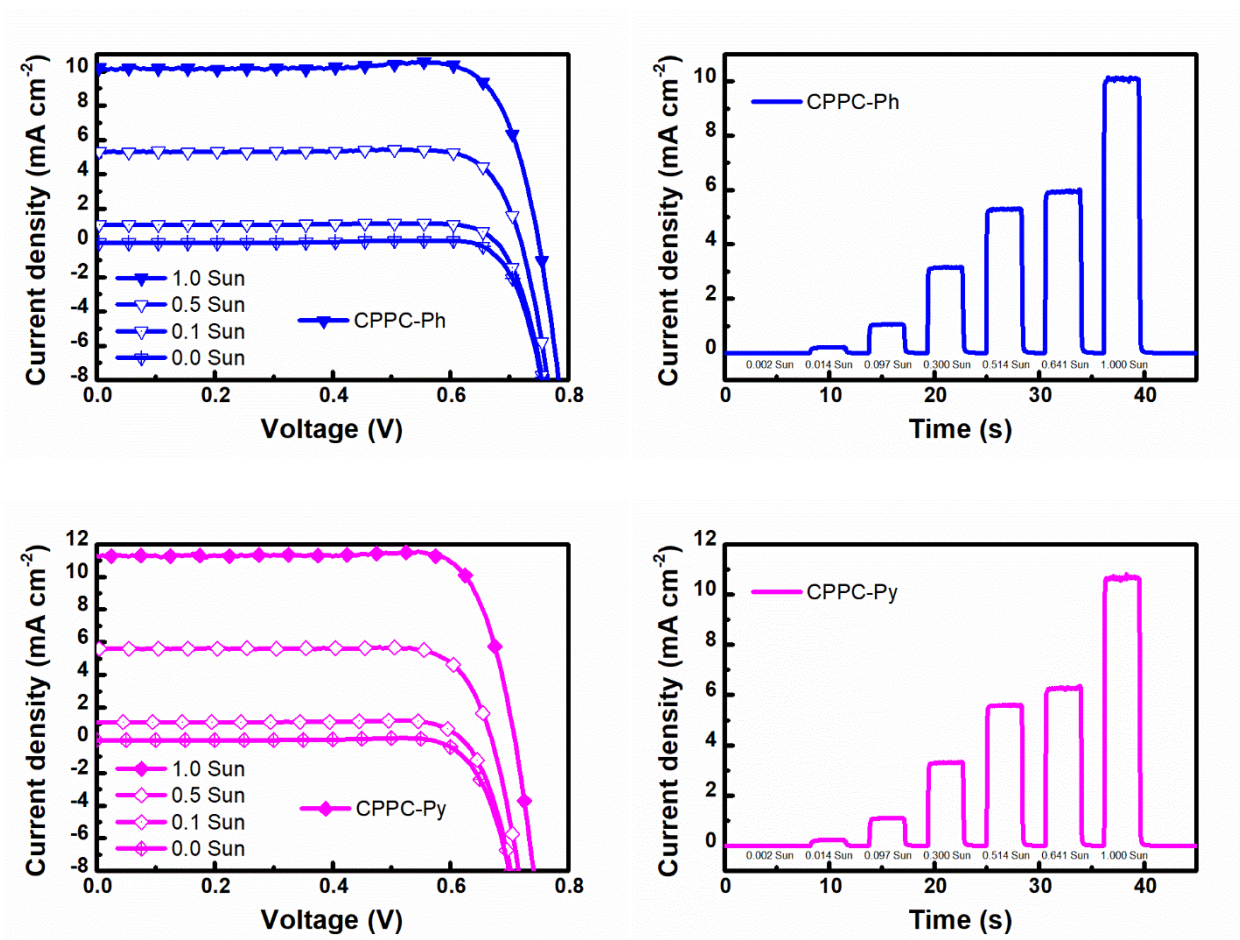

Fig. S3. (left) I-V curves measured under different light intensities and (right) current dynamic plots of the DSSCs based on CPPC dyes.

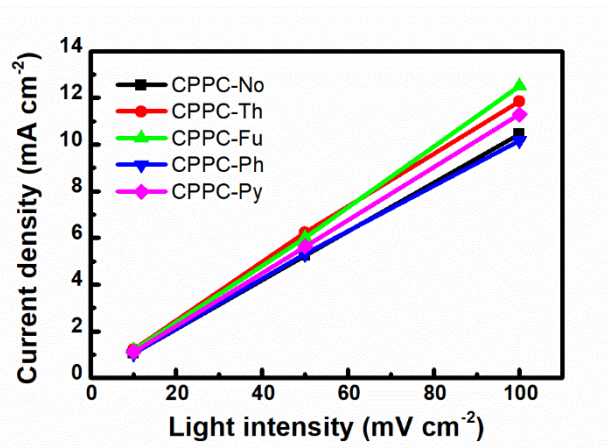

Fig. S4. Light intensity - current density dependence plots of the devices based on CPPC dyes.

Table S3 Photovoltaic parameters of the devices based on CPPC dyes under different light intensities.

| Dye     | $P_{in}$ (mW cm <sup>-2</sup> ) | $J_{sc}$ (mA cm <sup>-2</sup> ) | $V_{oc}$ (mV) | $FF$ | $PCE$ (%) |
|---------|---------------------------------|---------------------------------|---------------|------|-----------|
| CPPC-No | 100                             | 10.45                           | 748.63        | 0.81 | 6.56      |

|                |     |       |        |      |      |
|----------------|-----|-------|--------|------|------|
|                | 50  | 5.25  | 721.83 | 0.80 | 5.97 |
|                | 10  | 1.06  | 677.07 | 0.82 | 5.90 |
|                | 100 | 11.84 | 717.49 | 0.80 | 7.01 |
| <b>CPPC-Th</b> | 50  | 6.23  | 695.53 | 0.80 | 6.80 |
|                | 10  | 1.22  | 646.74 | 0.82 | 6.47 |
|                | 100 | 12.50 | 731.54 | 0.80 | 7.48 |
| <b>CPPC-Fu</b> | 50  | 6.00  | 717.52 | 0.78 | 6.65 |
|                | 10  | 1.19  | 680.86 | 0.80 | 6.48 |
|                | 100 | 10.17 | 749.61 | 0.83 | 6.52 |
| <b>CPPC-Ph</b> | 50  | 5.31  | 719.60 | 0.83 | 6.24 |
|                | 10  | 1.05  | 678.36 | 0.82 | 5.84 |
|                | 100 | 11.29 | 708.86 | 0.82 | 6.82 |
| <b>CPPC-Py</b> | 50  | 5.63  | 669.95 | 0.81 | 6.02 |
|                | 10  | 1.11  | 621.11 | 0.82 | 5.65 |

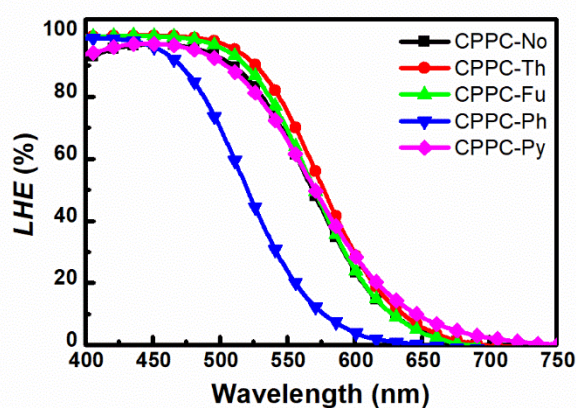

Fig. S5. *LHE* spectra of the dye-grafted TiO<sub>2</sub> films of CPPC dyes.

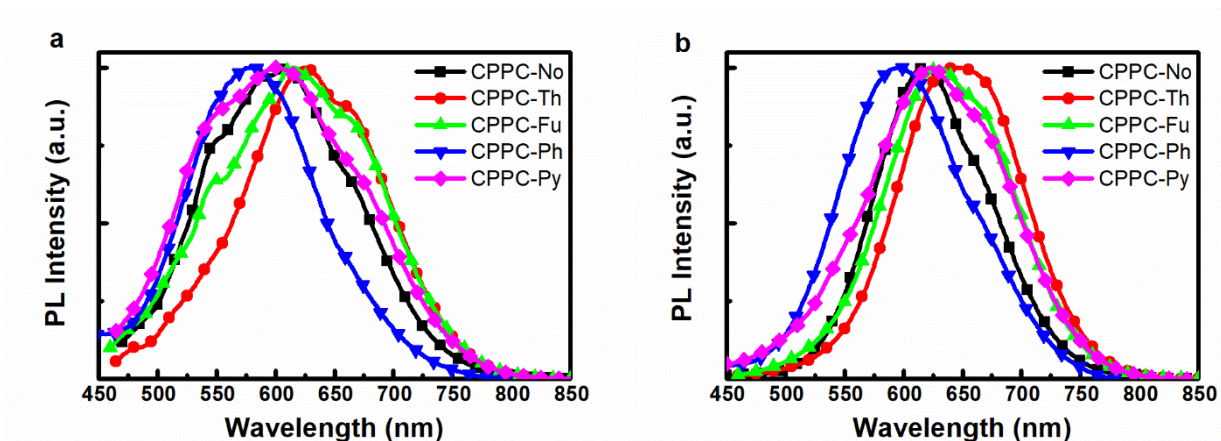

Fig. S6. Steady-state photoluminescence spectra of CPPC dyes (a) on TiO<sub>2</sub> and (b) Al<sub>2</sub>O<sub>3</sub> films.



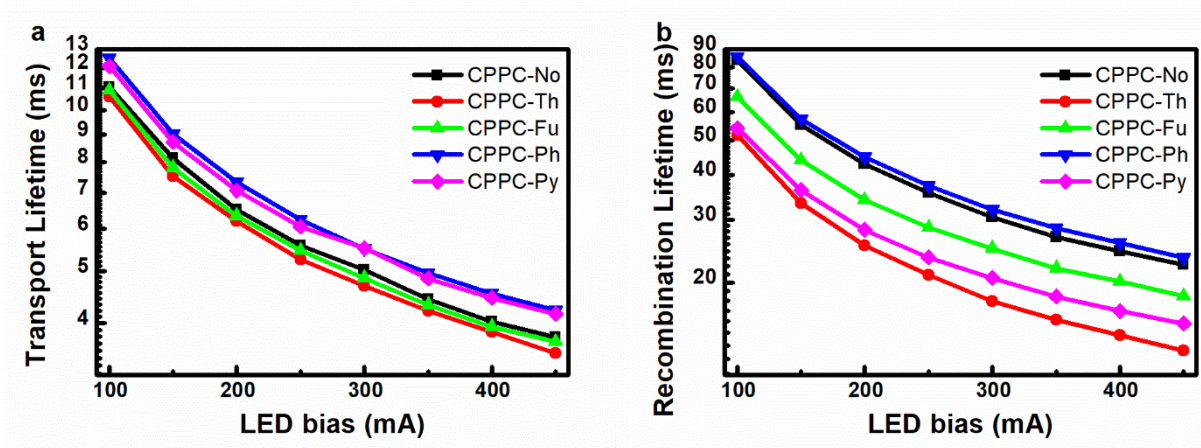

Fig. S7. (a) Charge transport lifetime and (b) charge recombination lifetime of the DSSC devices based on CPPC dyes.

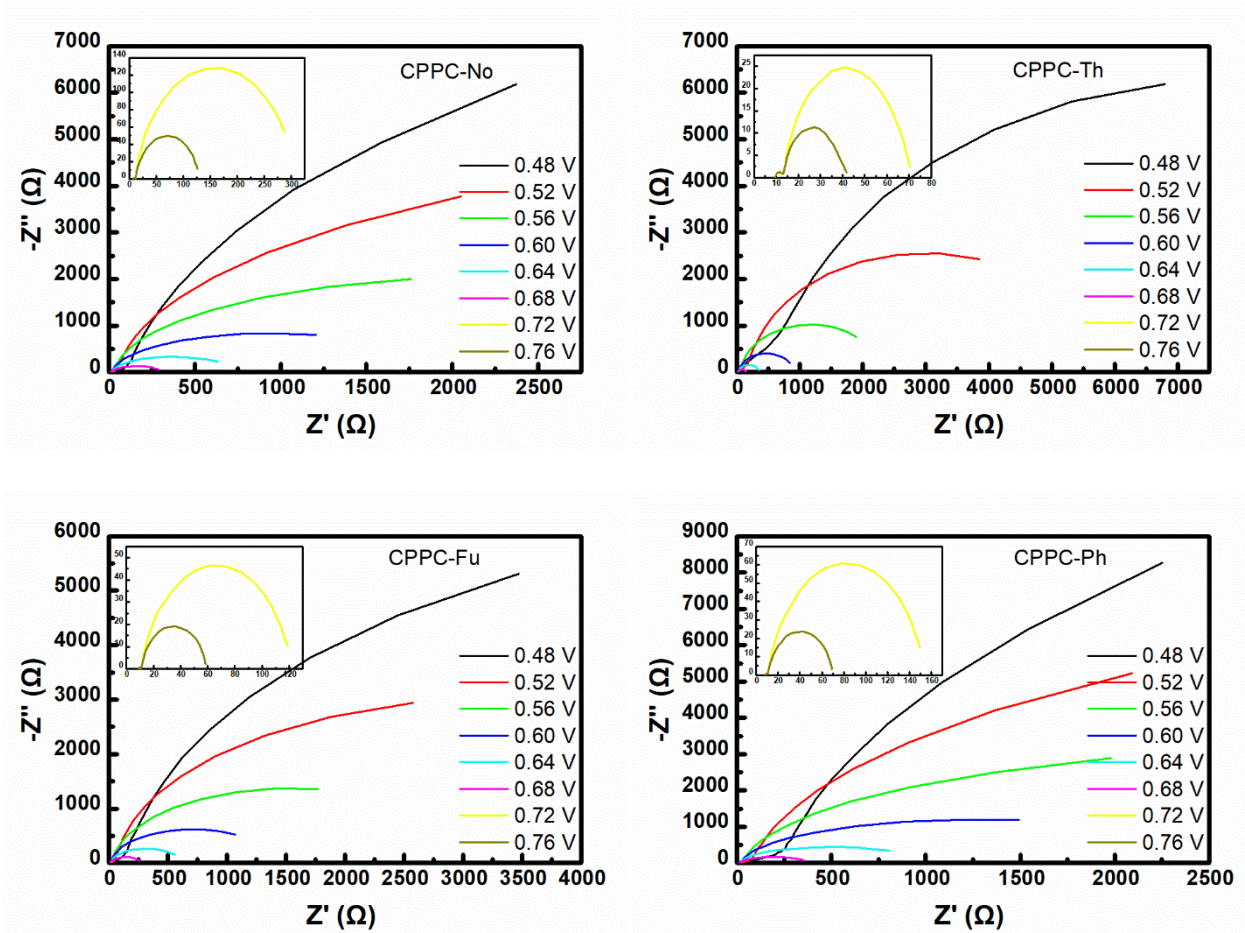

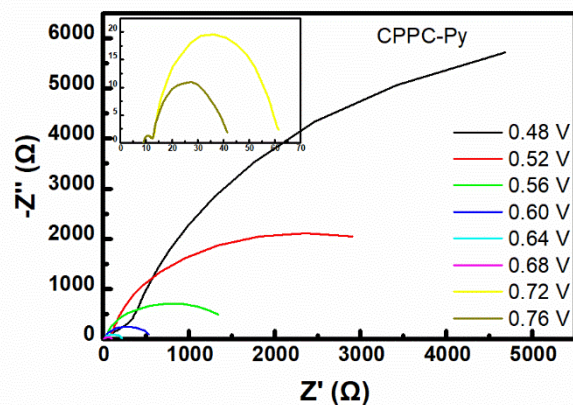

Fig. S8. Nyquist plots of the DSSC devices based on CPPC dyes.

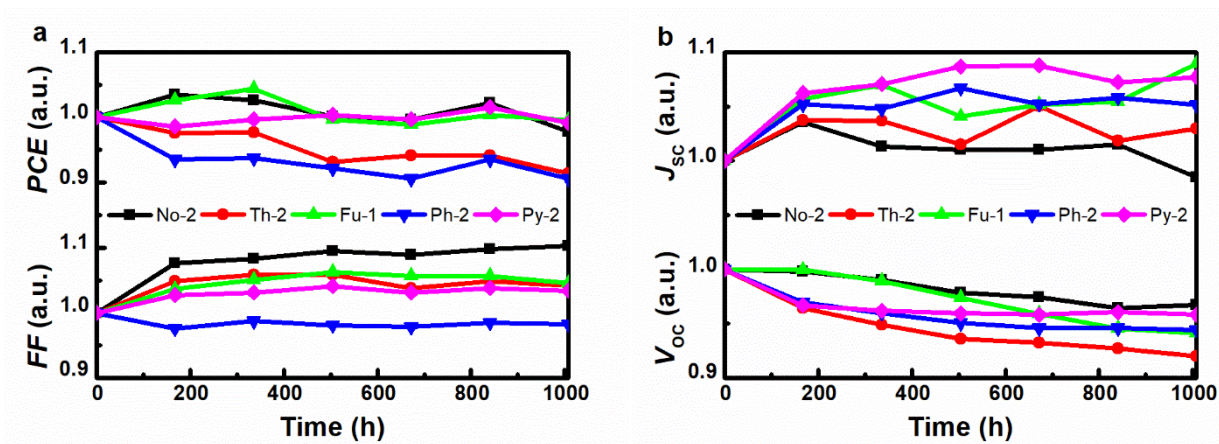

Fig. S9. Time dependence of the (a)  $PCE$ ,  $FF$  and (b)  $J_{sc}$ ,  $V_{oc}$  of the DSSCs based on CPPC dyes obtained over a period of 1000 h in ambient air at room temperature.

## Synthesis

### 5-(7-(3-(9H-carbazol-9-yl)phenyl)-10-hexyl-10H-phenothiazin-3-yl)thiophene-2-carbaldehyde (3)

A mixture of compound **2** (602 mg, 1 mmol), (5-formylthiophen-2-yl)boronic acid (187 mg, 1.2 mmol),  $\text{Pd}(\text{PPh}_3)_4$  (116 mg, 0.1 mmol) and tetrabutylammonium bromide (TBAB 96.6 mg, 0.3 mmol) in  $\text{K}_2\text{CO}_3$  aqueous solution (2.5 ml, 1 M) and tetrahydrofuran (THF, 15 mL) was stirred and heated at 85 °C under a nitrogen atmosphere for 18 h. Water was added to quench the reaction afterwards. The crude product was extracted with DCM and saltwater three times and dried over anhydrous  $\text{Na}_2\text{SO}_4$ . The solvent was removed under reduced pressure on a rotary evaporator, and the crude product was purified by column chromatography using petroleum ether/dichloromethane (PE/DCM,



2:1) as the eluent to give compound **3** as a yellow solid in a yield of 34% (216 mg). <sup>1</sup>H NMR (400 MHz, CDCl<sub>3</sub>): δ 9.84 (s, 1H), 8.16 (d, *J* = 7.7 Hz, 2H), 7.72 (s, 1H), 7.68 (d, *J* = 4.0 Hz, 1H), 7.62 (s, 1H), 7.51 (d, *J* = 6.7 Hz, 1H), 7.46-7.37 (m, 8H), 7.33-7.25 (m, 3H), 6.91 (d, *J* = 8.3 Hz, 1H), 6.84 (d, *J* = 8.5 Hz, 1H), 3.86 (t, *J* = 6.9 Hz, 2H), 1.82 (p, *J* = 7.9 Hz, 2H), 1.48-1.41 (m, 2H), 1.31 (d, *J* = 3.6 Hz, 4H), 0.88 (t, *J* = 6.9 Hz, 4H). <sup>13</sup>C NMR (101 MHz, CDCl<sub>3</sub>): δ 181.3, 148.1, 144.8, 143.8, 142.4, 141.1, 140.0, 138.2, 137.1, 130.8, 129.8, 129.3, 127.0, 126.6, 124.7, 123.4, 122.7, 121.4, 120.2, 119.8, 119.1, 118.5, 109.4, 48.7, 31.5, 27.0, 22.7, 14.1. MALDI-TOF (*m/z*): Anal. Calcd. for C<sub>41</sub>H<sub>34</sub>N<sub>2</sub>O<sub>2</sub>S: 634.2113, Found: 634.2110.

*5-(7-(3-(9H-carbazol-9-yl)phenyl)-10-hexyl-10H-phenothiazin-3-yl)furan-2-carbaldehyde (4)*

A mixture of compound **2** (602 mg, 1 mmol), (5-formylfuran-2-yl)boronic acid (168 mg, 1.2 mmol), Pd(PPh<sub>3</sub>)<sub>4</sub> (116 mg, 0.1 mmol) and TBAB (96.6 mg, 0.3 mmol) in K<sub>2</sub>CO<sub>3</sub> aqueous solution (2.5 ml, 1 M) and THF (15 mL) was stirred and heated at 85 °C under a nitrogen atmosphere for 18 h. Water was added to quench the reaction afterwards. The crude product was extracted with DCM and saltwater three times and dried over anhydrous Na<sub>2</sub>SO<sub>4</sub>. The solvent was removed under reduced pressure on a rotary evaporator, and the crude product was purified by column chromatography using PE/DCM (2:1) as the eluent to give compound **4** as a yellow solid in a yield of 80% (495 mg). <sup>1</sup>H NMR (400 MHz, CDCl<sub>3</sub>): δ 9.60 (s, 1H), 8.17 (d, *J* = 7.6 Hz, 2H), 7.73 (s, 1H), 7.68-7.59 (m, 3H), 7.57-7.50 (m, 2H), 7.49-7.38 (m, 6H), 7.31 (t, *J* = 5.9 Hz, 3H), 6.91 (dd, *J* = 18.8, 8.8 Hz, 2H), 6.71 (d, *J* = 3.7 Hz, 1H), 3.96-3.84 (m, 2H), 1.88-1.79 (m, 2H), 1.49-1.44 (m, 2H), 1.32 (dd, *J* = 6.5, 3.7 Hz, 4H), 0.88 (s, 3H). <sup>13</sup>C NMR (101 MHz, CDCl<sub>3</sub>): δ 178.3, 159.8, 153.2, 142.4, 143.0, 139.7, 137.1, 131.8, 130.4, 127.3, 126.6, 122.7, 120.4, 121.3, 119.8, 119.2, 118.7, 116.0, 110.0, 109.2, 48.6, 27.3, 27.0, 22.7, 14.0. MALDI-TOF (*m/z*): Anal. Calcd. for C<sub>41</sub>H<sub>34</sub>N<sub>2</sub>O<sub>2</sub>S: 618.2341, Found: 618.2338.

*3-(3-(9H-carbazol-9-yl)phenyl)-10-hexyl-7-(4,4,5,5-tetramethyl-1,3,2-dioxaborolan-2-yl)-10H-phenothiazine (5)*

A mixture of compound **2** (602 mg, 1 mmol), bis(pinacolato)diboron (506 mg, 2 mmol), KOAc (294 mg, 3 mmol) and Pd(dppf)Cl<sub>2</sub> (37 mg, 0.05 mmol) in 1,4-dioxane (10 mL) was stirred and heated

at 110 °C under a nitrogen atmosphere for 12 h. Water was added to quench the reaction afterwards. The crude product was extracted with DCM and saltwater three times and dried over anhydrous Na<sub>2</sub>SO<sub>4</sub>. The solvent was removed under reduced pressure on a rotary evaporator, and the crude product was purified by column chromatography using PE/ethyl acetate (EA, 40:1) as the eluent to give compound **5** as a red solid in a yield of 88% (572 mg). <sup>1</sup>H NMR (400 MHz, CD<sub>2</sub>Cl<sub>2</sub>): δ 8.08 (dd, *J* = 7.8, 2.9 Hz, 2H), 7.67 (d, *J* = 5.2 Hz, 1H), 7.59 (dd, *J* = 4.7, 2.7 Hz, 2H), 7.46 (d, *J* = 7.5 Hz, 2H), 7.43-7.27 (m, 7H), 7.25-7.17 (m, 2H), 6.91-6.74 (m, 2H), 3.80 (d, *J* = 20.5 Hz, 2H), 3.64-3.51 (m, 2H), 1.79-1.64 (m, 2H), 1.41-1.30 (m, 2H), 1.22 (d, *J* = 2.0 Hz, 14H), 0.79 (dt, *J* = 8.7, 4.4 Hz, 3H). <sup>13</sup>C NMR (101 MHz, (CD<sub>3</sub>)<sub>2</sub>SO): δ 147.5, 144.3, 141.3, 140.6, 140.6, 138.0, 134.8, 134.1, 133.4, 131.2, 126.8, 125.8, 124.6, 124.5, 123.2, 123.2, 122.8, 121.0, 120.5, 120.5, 116.7, 115.7, 110.2, 84.0, 84.0, 47.0, 31.3, 31.3, 26.6, 26.2, 26.2, 25.1, 25.1, 22.5, 22.5, 14.3, 14.3. HRMS (ESI/QTOF) *m/z*: [M + H]<sup>+</sup> Calcd. for C<sub>42</sub>H<sub>44</sub>BN<sub>2</sub>O<sub>2</sub>S<sup>+</sup>: 651.3217; Found: 651.3224.

*6-(7-(3-(9H-carbazol-9-yl)phenyl)-10-hexyl-10H-phenothiazin-3-yl)nicotinaldehyde (6)*

A mixture of compound **5** (650 mg, 1 mmol), 2-bromo-5-formylpyridine (279 mg, 1.5 mmol), Pd(PPh<sub>3</sub>)<sub>4</sub> (116 mg, 0.1 mmol) and TBAB (96.6 mg, 0.3 mmol) in K<sub>2</sub>CO<sub>3</sub> aqueous solution (2.5 ml, 1 M) and THF (15 mL) was stirred and heated at 85 °C under a nitrogen atmosphere for 18 h. Water was added to quench the reaction afterwards. The crude product was extracted with DCM and saltwater three times and dried over anhydrous Na<sub>2</sub>SO<sub>4</sub>. The solvent was removed under reduced pressure on a rotary evaporator, and the crude product was purified by column chromatography using PE/DCM (1:1) as the eluent to give compound **6** as a red solid in a yield of 85% (534 mg). <sup>1</sup>H NMR (400 MHz, (CD<sub>3</sub>)<sub>2</sub>SO): δ 10.10 (d, *J* = 1.5 Hz, 1H), 9.10 (d, *J* = 4.0 Hz, 1H), 8.31-8.23 (m, 3H), 8.18-8.14 (m, 1H), 8.10-8.05 (m, 1H), 8.01-7.98 (m, 1H), 7.90 (d, *J* = 5.2 Hz, 1H), 7.86-7.81 (m, 1H), 7.78-7.72 (m, 1H), 7.67-7.56 (m, 3H), 7.49-7.42 (m, 4H), 7.35-7.28 (m, 2H), 7.21-7.13 (m, 2H), 3.98 (dd, *J* = 17.4, 9.5 Hz, 2H), 1.79-1.71 (m, 2H), 1.44 (d, *J* = 21.2 Hz, 2H), 1.27-1.22 (m, 4H), 0.84 (t, *J* = 4.4 Hz, 3H). <sup>13</sup>C NMR (101 MHz, (CD<sub>3</sub>)<sub>2</sub>SO): δ 192.1, 159.8, 152.4, 146.4, 143.9, 141.4, 140.6, 138.4, 137.4, 134.2, 132.2, 131.1, 130.4, 129.9, 127.4, 126.8, 126.1, 125.7, 124.5, 124.0, 123.2, 121.0,

120.5, 119.9, 117.0, 116.1, 110.1, 31.3, 26.3, 22.5, 14.3. HRMS (ESI/QTOF) m/z: [M + H]<sup>+</sup> Calcd. for C<sub>42</sub>H<sub>36</sub>N<sub>3</sub>OS<sup>+</sup>: 630.2579; Found: 630.2579.

*3-(7-(3-(9H-carbazol-9-yl)phenyl)-10-hexyl-10H-phenothiazin-3-yl)-2-cyanoacrylic acid (CPPC-No)*

A mixture of compound **1** (552 mg, 1 mmol), cyanoacetic acid (170 mg, 2 mmol) and NH<sub>4</sub>OAc (77 mg, 1 mmol) in CH<sub>3</sub>COOH (10 mL) was stirred and heated at 90 °C under a nitrogen atmosphere for 24 h. Water was added to quench the reaction afterwards. The crude product was extracted with DCM and saltwater three times and dried over anhydrous Na<sub>2</sub>SO<sub>4</sub>. The solvent was removed under reduced pressure on a rotary evaporator, and the crude product was purified by column chromatography using methanol (MeOH)/DCM (1:20) as the eluent to give **CPPC-No** as a crimson solid in a yield of 95% (588 mg). <sup>1</sup>H NMR (400 MHz, CDCl<sub>3</sub>): δ 8.16 (d, *J* = 7.7 Hz, 2H), 8.08 (s, 1H), 7.93 (dd, *J* = 8.7, 2.1 Hz, 1H), 7.73 (d, *J* = 1.7 Hz, 1H), 7.64 (tdd, *J* = 7.9, 5.8, 2.4 Hz, 3H), 7.55-7.51 (m, 1H), 7.48-7.40 (m, 6H), 7.36 (d, *J* = 2.1 Hz, 1H), 7.30 (ddd, *J* = 8.0, 6.7, 1.4 Hz, 2H), 6.91 (dd, *J* = 21.9, 8.7 Hz, 2H), 3.93-3.87 (m, 2H), 1.84 (dt, *J* = 14.8, 7.5 Hz, 2H), 1.46 (s, 2H), 1.37-1.30 (m, 4H), 0.89 (t, *J* = 7.1 Hz, 3H). <sup>13</sup>C NMR (101 MHz, CDCl<sub>3</sub>): δ 168.1, 168.1, 154.4, 149.6, 142.3, 141.3, 140.8, 138.3, 135.7, 132.0, 130.4, 126.3, 126.1, 125.8, 125.4, 125.4, 124.9, 124.0, 123.9, 123.8, 123.7, 123.5, 120.4, 120.1, 116.1, 116.0, 114.9, 109.8, 97.7, 48.2, 31.4, 26.6, 26.5, 22.6, 14.1, 14.0. HRMS (ESI/QTOF) m/z: [M - H]<sup>-</sup> Calcd. for C<sub>40</sub>H<sub>32</sub>N<sub>3</sub>O<sub>2</sub>S<sup>-</sup>: 618.2215; Found: 618.2215.

*3-(5-(7-(3-(9H-carbazol-9-yl)phenyl)-10-hexyl-10H-phenothiazin-3-yl)thiophen-2-yl)-2-cyanoacrylic acid (CPPC-Th)*

A mixture of compound **3** (634 mg, 1 mmol), cyanoacetic acid (170 mg, 2 mmol) and NH<sub>4</sub>OAc (77 mg, 1 mmol) in CH<sub>3</sub>COOH (10 mL) was stirred and heated at 90 °C under a nitrogen atmosphere for 24 h. Water was added to quench the reaction afterwards. The crude product was extracted with DCM and saltwater three times and dried over anhydrous Na<sub>2</sub>SO<sub>4</sub>. The solvent was removed under reduced pressure on a rotary evaporator, and the crude product was purified by column chromatography using MeOH/DCM (1:20) as the eluent to give **CPPC-Th** as a crimson solid in a



yield of 93% (650 mg). <sup>1</sup>H NMR (400 MHz, (CD<sub>3</sub>)<sub>2</sub>SO): δ 8.46 (s, 1H), 8.26 (d, *J* = 7.8 Hz, 2H), 7.97 (d, *J* = 4.1 Hz, 1H), 7.87 (s, 1H), 7.80 (d, *J* = 7.8 Hz, 1H), 7.76-7.67 (m, 2H), 7.64-7.54 (m, 6H), 7.48-7.40 (m, 4H), 7.30 (ddd, *J* = 7.9, 5.3, 2.7 Hz, 2H), 7.10 (t, *J* = 9.5 Hz, 2H), 3.92 (t, *J* = 7.2 Hz, 2H), 1.45-1.35 (m, 2H), 1.29-1.19 (m, 6H), 0.82 (t, *J* = 6.9 Hz, 3H). <sup>13</sup>C NMR (101 MHz, (CD<sub>3</sub>)<sub>2</sub>SO): δ 164.1, 152.0, 145.8, 143.9, 141.3, 140.6, 138.0, 134.5, 134.2, 131.2, 127.2, 126.8, 126.4, 125.9, 125.8, 124.8, 124.7, 124.6, 124.5, 123.7, 123.3, 121.0, 120.5, 117.4, 116.8, 116.7, 110.2, 47.2, 31.6, 31.3, 30.3, 29.50, 26.6, 26.3, 22.5, 14.3. HRMS (ESI/QTOF) *m/z*: [M - H<sup>+</sup>]<sup>-</sup> Calcd. for C<sub>44</sub>H<sub>34</sub>N<sub>3</sub>O<sub>2</sub>S<sub>2</sub><sup>-</sup>: 700.2092; Found: 700.2092.

*3-(5-(7-(3-(9H-carbazol-9-yl)phenyl)-10-hexyl-10H-phenothiazin-3-yl)furan-2-yl)-2-cyanoacrylic acid (CPPC-Fu)*

A mixture of compound **4** (618 mg, 1 mmol), cyanoacetic acid (170 mg, 2 mmol) and NH<sub>4</sub>OAc (77 mg, 1 mmol) in CH<sub>3</sub>COOH (10 mL) was stirred and heated at 90 °C under a nitrogen atmosphere for 24 h. Water was added to quench the reaction afterwards. The crude product was extracted with DCM and saltwater three times and dried over anhydrous Na<sub>2</sub>SO<sub>4</sub>. The solvent was removed under reduced pressure on a rotary evaporator, and the crude product was purified by column chromatography using MeOH/DCM (1:15) as the eluent to give **CPFC-Fu** as a crimson solid in a yield of 91% (620 mg). <sup>1</sup>H NMR (400 MHz, (CD<sub>3</sub>)<sub>2</sub>SO): δ 8.26 (d, *J* = 7.8 Hz, 2H), 8.02 (s, 1H), 7.89 (s, 1H), 7.82 (d, *J* = 8.4 Hz, 1H), 7.78-7.67 (m, 3H), 7.63 (d, *J* = 7.4 Hz, 2H), 7.57 (d, *J* = 9.5 Hz, 1H), 7.51 (d, *J* = 4.0 Hz, 1H), 7.49-7.38 (m, 4H), 7.38-7.24 (m, 4H), 7.15 (dd, *J* = 16.3, 9.5 Hz, 2H), 4.06-3.87 (m, 2H), 1.79-1.62 (m, 2H), 1.34-1.24 (m, 6H), 0.82 (t, *J* = 7.1 Hz, 3H). <sup>13</sup>C NMR (101 MHz, (CD<sub>3</sub>)<sub>2</sub>SO): δ 164.5, 158.8, 147.7, 146.0, 143.9, 141.3, 140.6, 138.0, 137.9, 134.3, 131.2, 127.5, 126.8, 125.9, 125.8, 125.3, 124.6, 124.2, 123.9, 123.6, 123.3, 123.3, 121.0, 120.5, 117.2, 116.9, 116.6, 110.2, 109.6, 96.8, 47.3, 32.0, 31.8, 31.3, 29.9, 29.5, 29.2, 26.8, 26.6, 26.2, 22.5, 14.4, 14.3. HRMS (ESI/QTOF) *m/z*: [M - H<sup>+</sup>]<sup>-</sup> Calcd. for C<sub>44</sub>H<sub>34</sub>N<sub>3</sub>O<sub>3</sub>S<sup>-</sup>: 684.2321; Found: 684.2321.

*3-(6-(7-(3-(9H-carbazol-9-yl)phenyl)-10-hexyl-10H-phenothiazin-3-yl)pyridin-3-yl)-2-cyanoacrylic acid (CPPC-Py)*

A mixture of compound **6** (629 mg, 1 mmol), cyanoacetic acid (170 mg, 2 mmol) and NH<sub>4</sub>OAc (77 mg, 1 mmol) in CH<sub>3</sub>COOH (15 mL) was stirred and heated at 85 °C under a nitrogen atmosphere for 20 h. Water was added to quench the reaction afterwards. The crude product was extracted with DCM and saltwater three times and dried over anhydrous Na<sub>2</sub>SO<sub>4</sub>. The solvent was removed under reduced pressure on a rotary evaporator, and the crude product was purified by column chromatography using MeOH/DCM (1:20) as the eluent to give **CPFC-Py** as a red solid in a yield of 86% (599 mg). <sup>1</sup>H NMR (400 MHz, (CD<sub>3</sub>)<sub>2</sub>SO): δ 8.94 (d, *J* = 4.5 Hz, 1H), 8.46-8.37 (m, 1H), 8.28 (dd, *J* = 7.8, 2.7 Hz, 2H), 8.11-8.06 (m, 1H), 8.05-7.97 (m, 2H), 7.97-7.93 (m, 1H), 7.90 (d, *J* = 5.3 Hz, 1H), 7.87-7.80 (m, 1H), 7.78-7.70 (m, 1H), 7.68-7.54 (m, 3H), 7.51-7.39 (m, 4H), 7.36-7.27 (m, 2H), 7.21-7.08 (m, 2H), 4.02-3.92 (m, 2H), 1.74 (d, *J* = 14.6 Hz, 2H), 1.42 (s, 2H), 1.33-1.20 (m, 4H), 0.90-0.76 (m, 3H). <sup>13</sup>C NMR (101 MHz, (CD<sub>3</sub>)<sub>2</sub>SO): δ 156.5, 151.7, 146.2, 144.1, 141.3, 140.6, 138.0, 136.5, 134.1, 132.3, 131.2, 126.8, 125.8, 124.6, 124.5, 124.0, 123.8, 123.2, 121.0, 120.5, 119.6, 116.3, 110.2, 31.3, 26.6, 26.3, 22.5, 14.3. HRMS (ESI/QTOF) *m/z*: [M - H<sup>+</sup>]<sup>-</sup> Calcd. for C<sub>45</sub>H<sub>35</sub>N<sub>4</sub>O<sub>2</sub>S<sup>-</sup>: 695.2481; Found 695.2480.

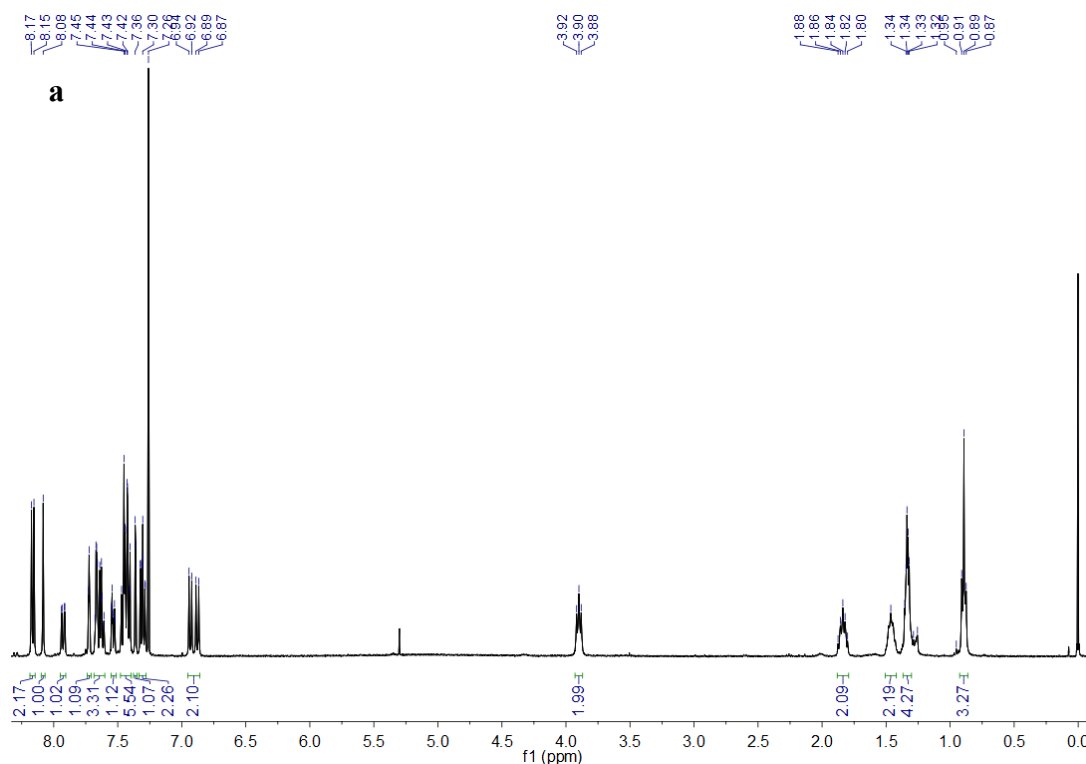

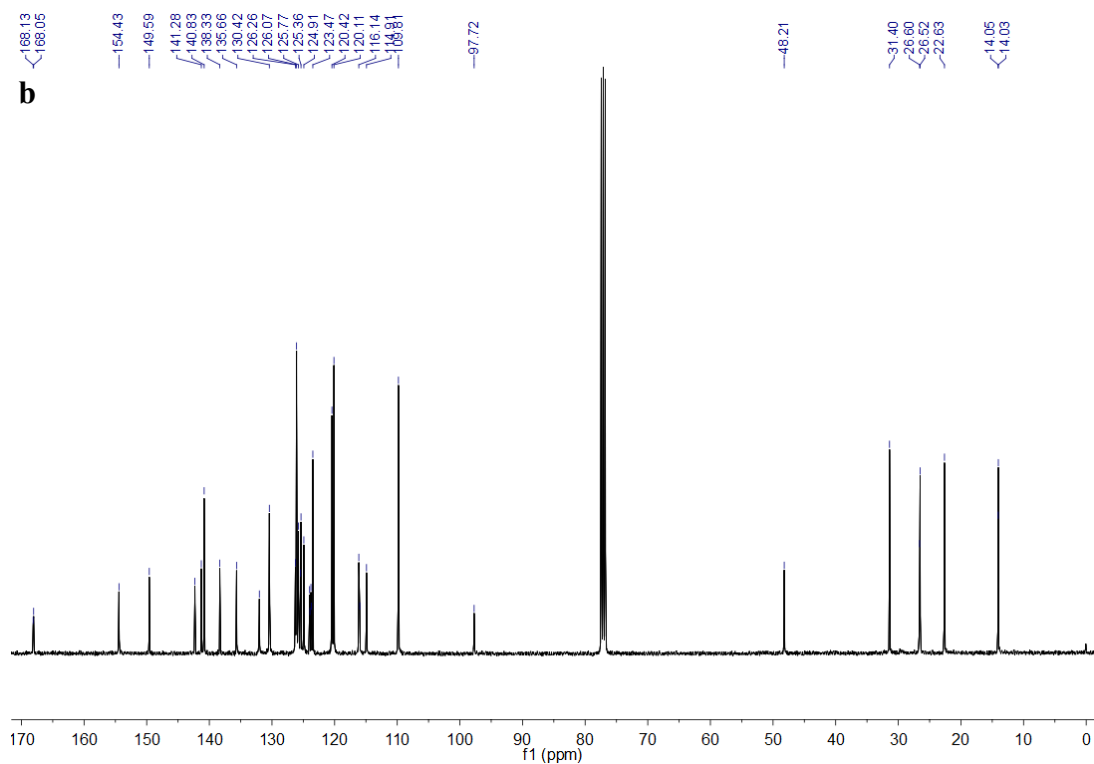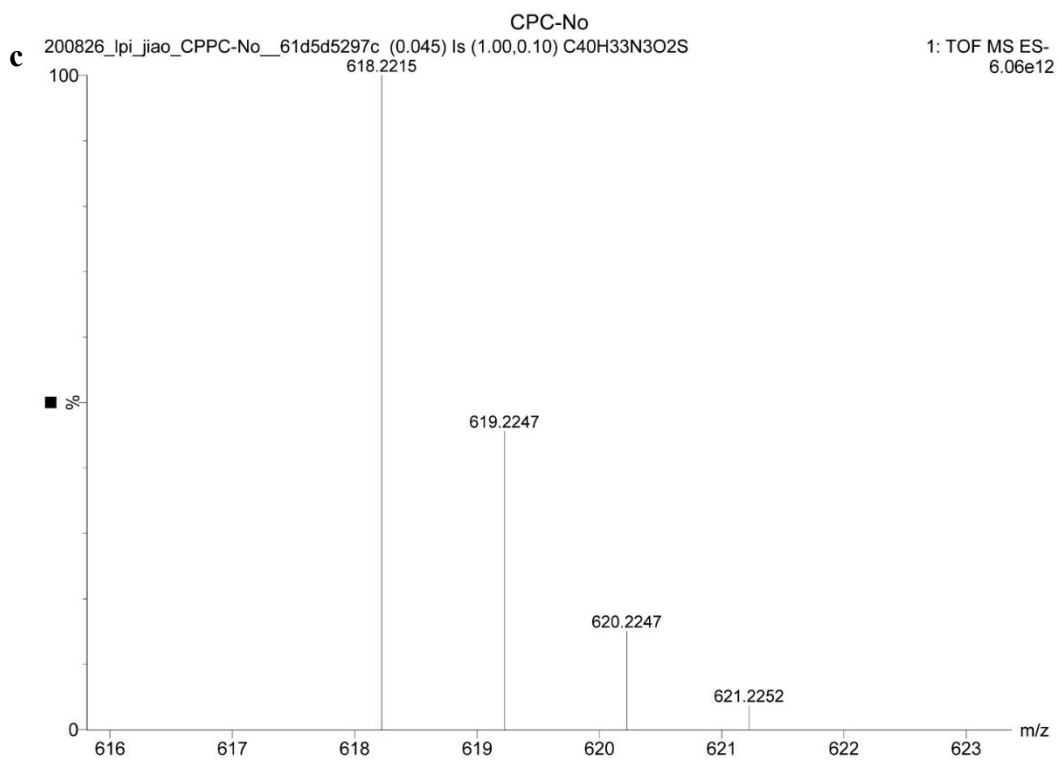

**Fig. S10.** (a)  $^1\text{H}$  NMR in  $\text{CDCl}_3$ , (b)  $^{13}\text{C}$  NMR in  $\text{CDCl}_3$  and (c) HRMS of CPC-No.



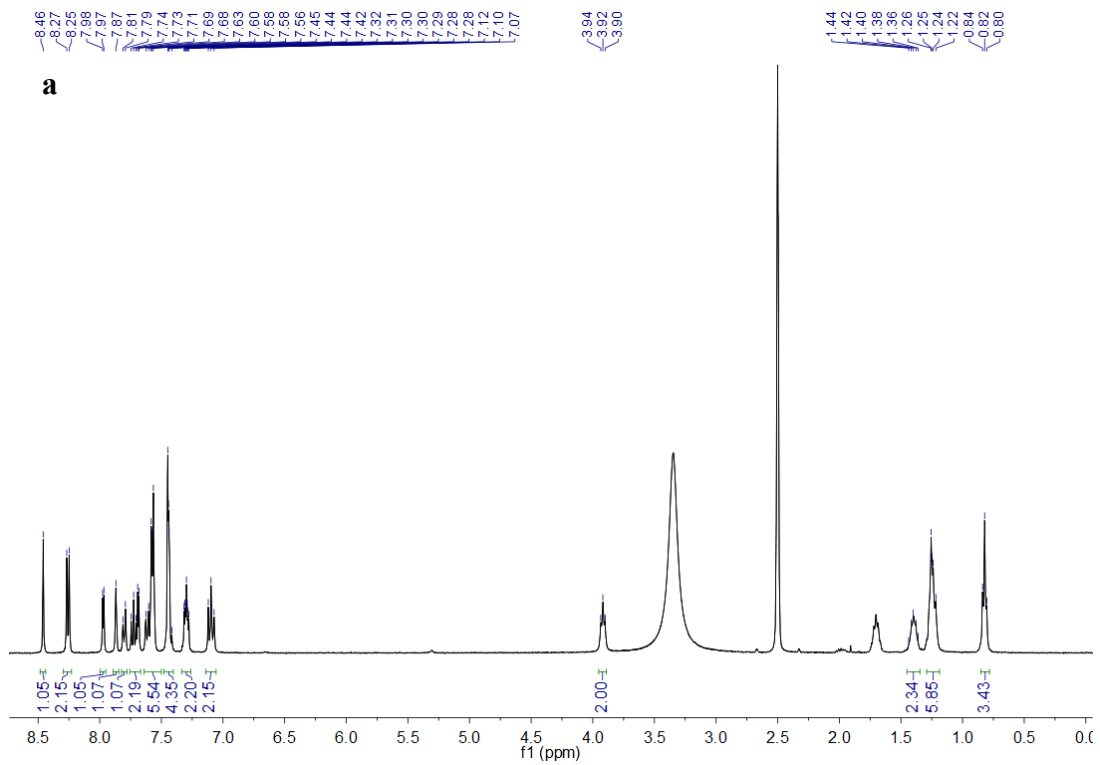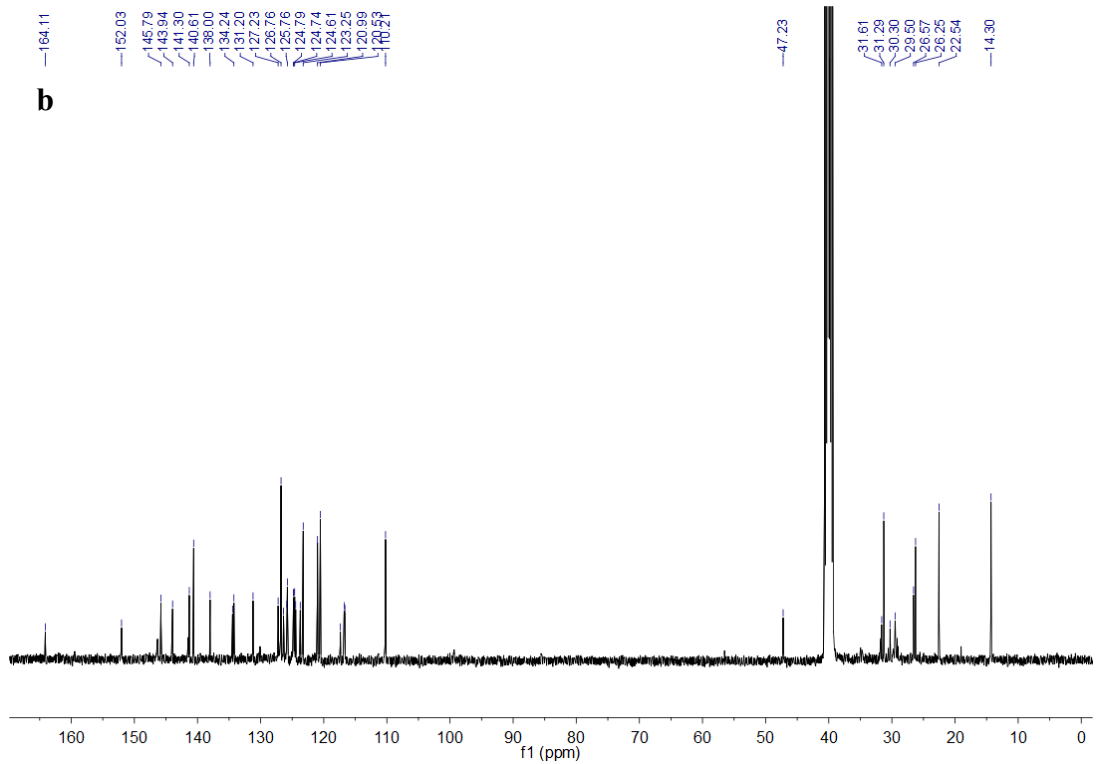

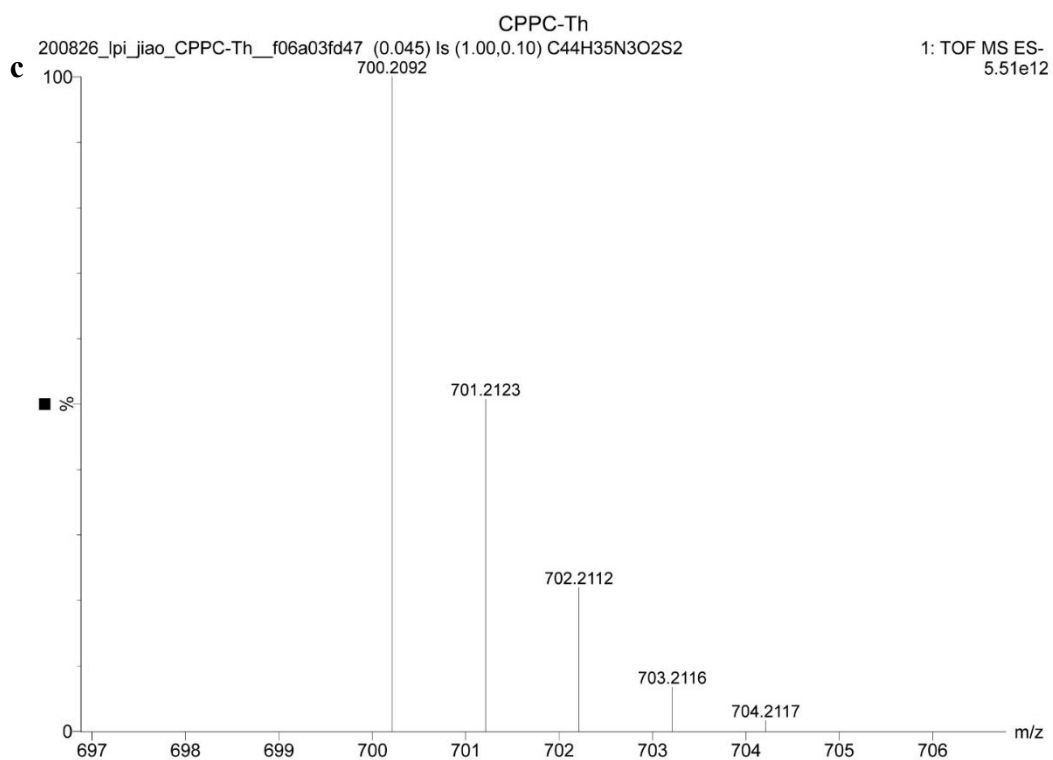

**Fig. S11.** (a)  $^1\text{H}$  NMR in  $(\text{CD}_3)_2\text{SO}$ , (b)  $^{13}\text{C}$  NMR in  $(\text{CD}_3)_2\text{SO}$  and (c) HRMS of CPPC-Th.

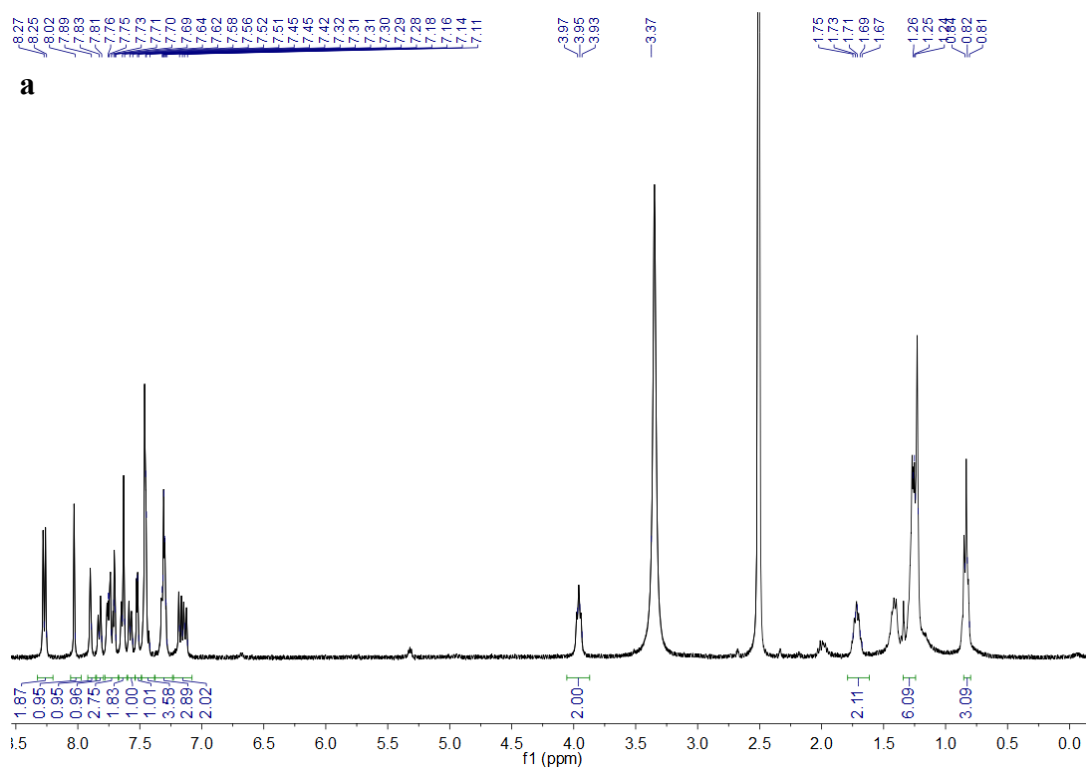

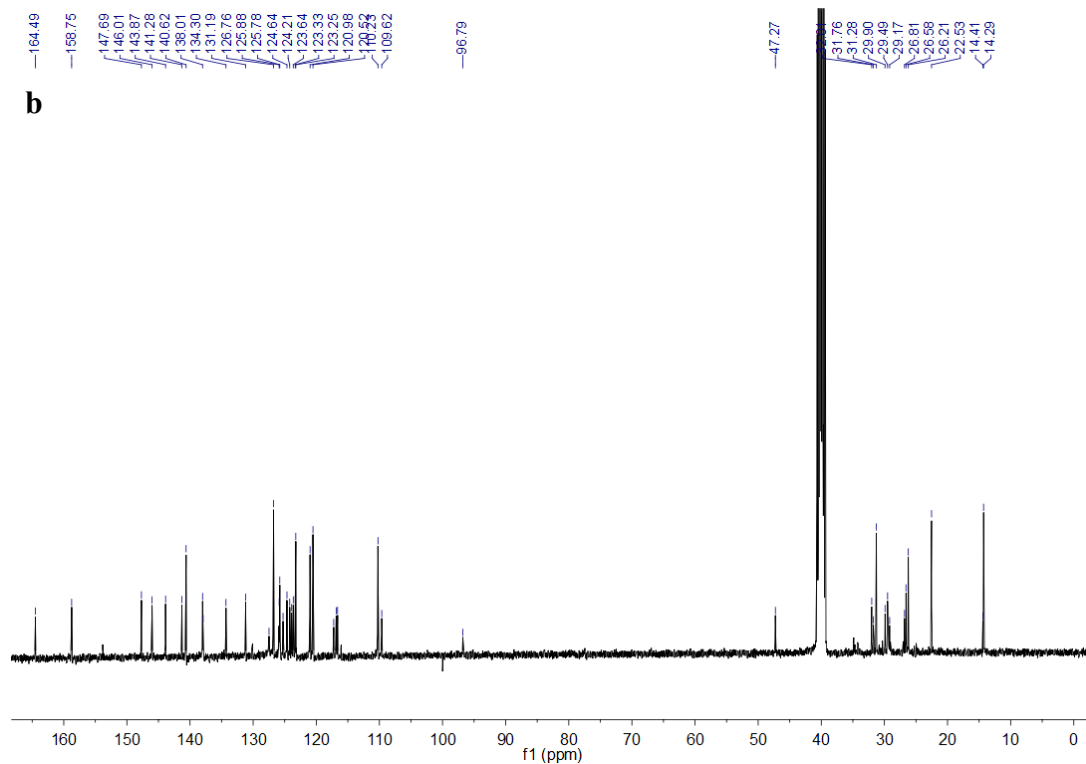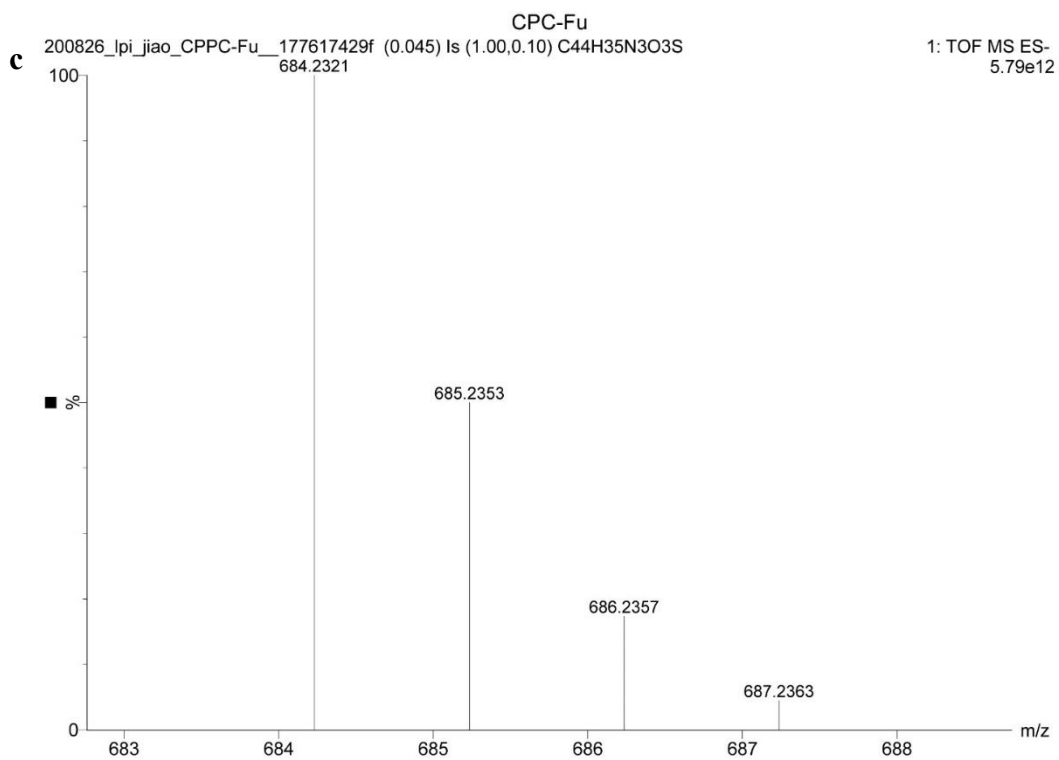

**Fig. S12.** (a)  $^1\text{H}$  NMR in  $(\text{CD}_3)_2\text{SO}$ , (b)  $^{13}\text{C}$  NMR in  $(\text{CD}_3)_2\text{SO}$  and (c) HRMS of **CPPC-Fu**.



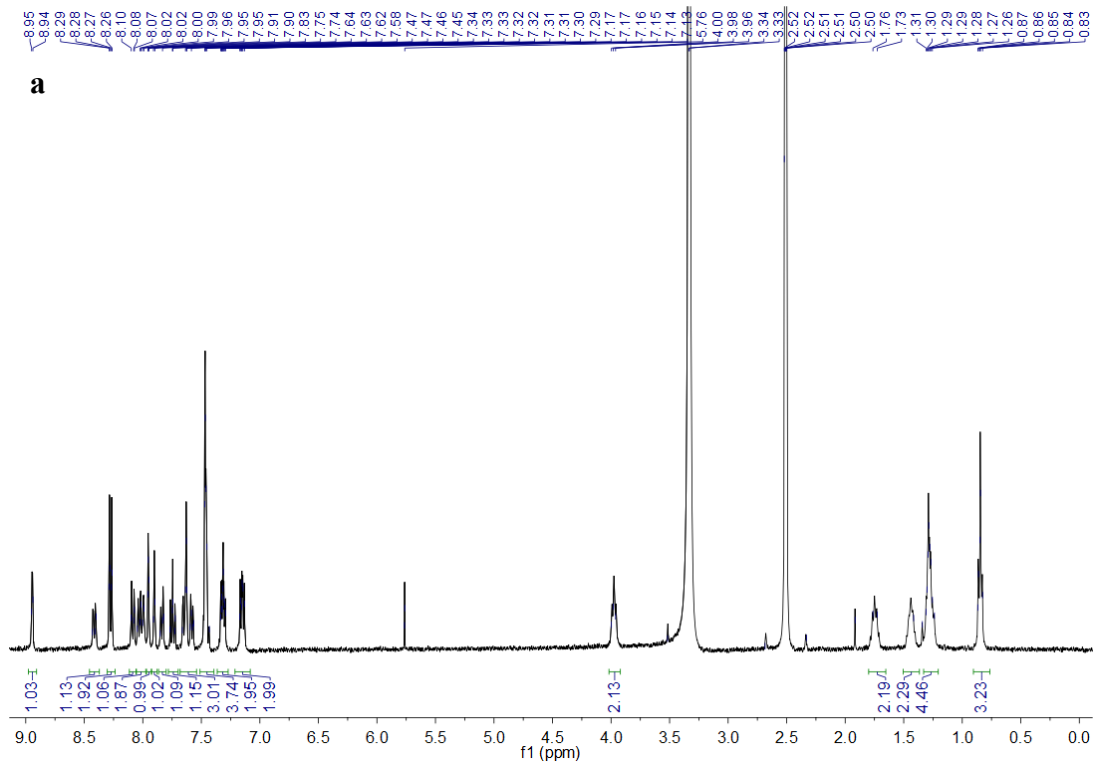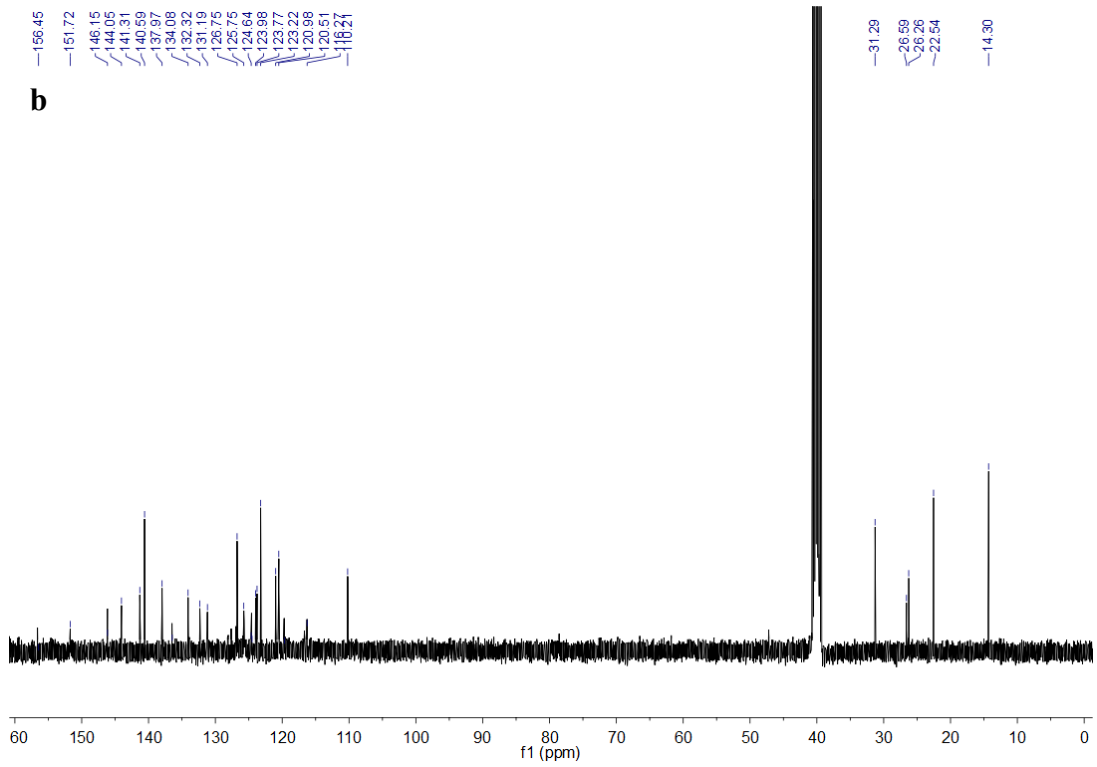

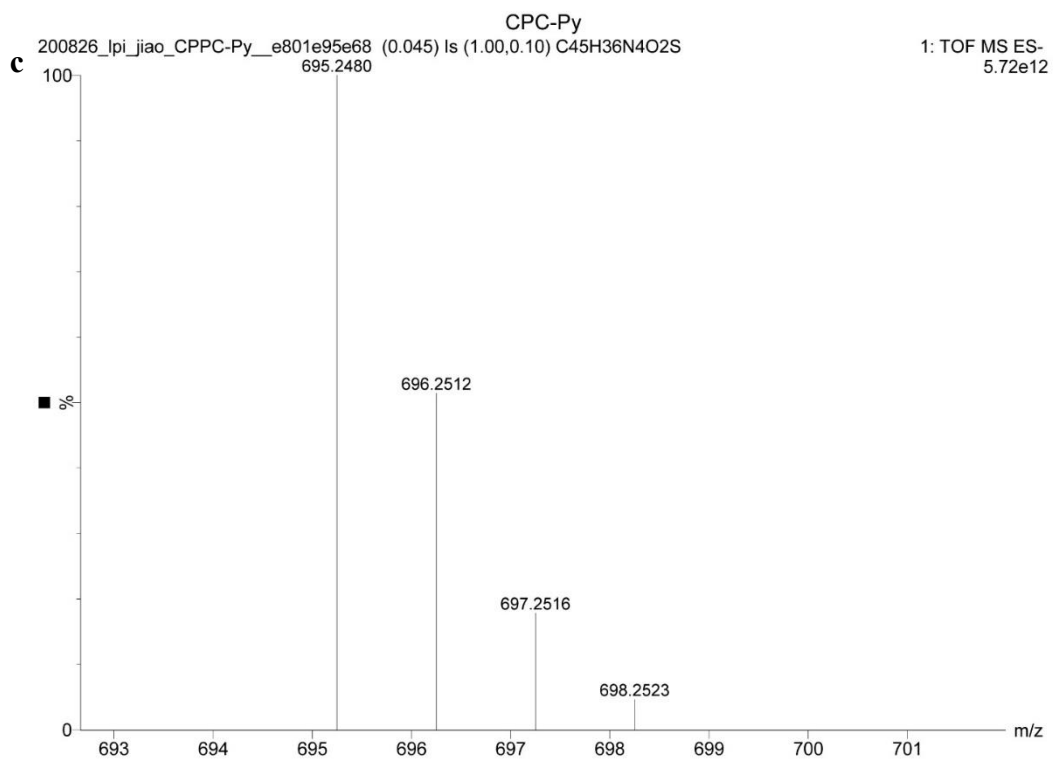

**Fig. S13.** (a)  $^1\text{H}$  NMR in  $(\text{CD}_3)_2\text{SO}$ , (b)  $^{13}\text{C}$  NMR in  $(\text{CD}_3)_2\text{SO}$  and (c) HRMS of CPPC-Py.
